# Supplementary material
Source: PubMed Central journal article supplement (PMC7484038)
Supplement: NIHMS1617988-supplement-1.pdf [file NIHMS1617988-supplement-1.pdf]

632 **Appendix A. Supplementary Material**

633 *Appendix A.1. Histological sectioning*

634 After diffusion tensor imaging, the injected specimens underwent serial histological section-  
635 ing. The tissue samples were fixed in 10% neutral buffered formalin, immersed in 70%  
636 ethanol, and embedded in paraffin. 20 5- $\mu$ m sections were obtained with a step size of 300  
637  $\mu$ m, spanning across the thickness of each specimen, and Masson's trichrome staining was  
638 used to identify the myofibers, collagen fibers, and hydrogel. Sections were photographed  
639 with a Nikon SMZ 800 microscope. Histology was performed at Histoserv, Inc. (German-  
640 town, MD).

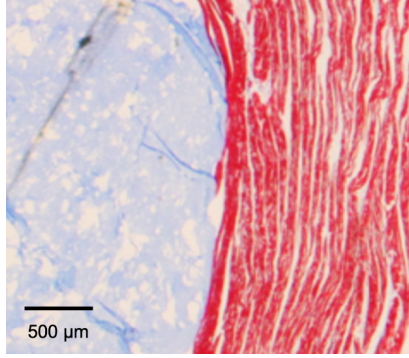

**Fig. A.1: Histology.** Masson trichrome stain of injected myocardium showing interface of tissue (red) and hydrogel (blue).

641 *Appendix A.2. Maximum tangent modulus vs. injection volume*

642 Maximum tangent modulus  $m$  was determined using the reaction forces computed on the  
 643 mesh boundaries in all deformation modes for each of the parametric simulations. Simula-  
 644 tions varied by injection placement in the transmural direction, injection volume, hydrogel  
 645 stiffness, and post-MI myocardium material parameters. We simulated the myocardium  
 646 without hydrogel inclusion to emulate the control response, using  $n = 3$  meshes with identi-  
 647 cal fiber orientation mappings and material properties. To assess maximum tangent modulus  
 648  $m$  as a function of injection volume, group averages of all transmural placements (endo, mid,  
 649 epi) were computed at each volume (0%, 1.5%, 5%, and 17%),  $n = 3$  for each group. These  
 650 computations were done separately for both post-MI time points (0 WK and 4 WK).

651 Group-averaged  $m$  was displayed as mean  $\pm$  standard error of the mean (SEM). We  
 652 used a two sample t-test to compare group averages, and p-values  $\leq 0.05$  were considered  
 653 statistically significant. All statistical analysis was performed using MATLAB.

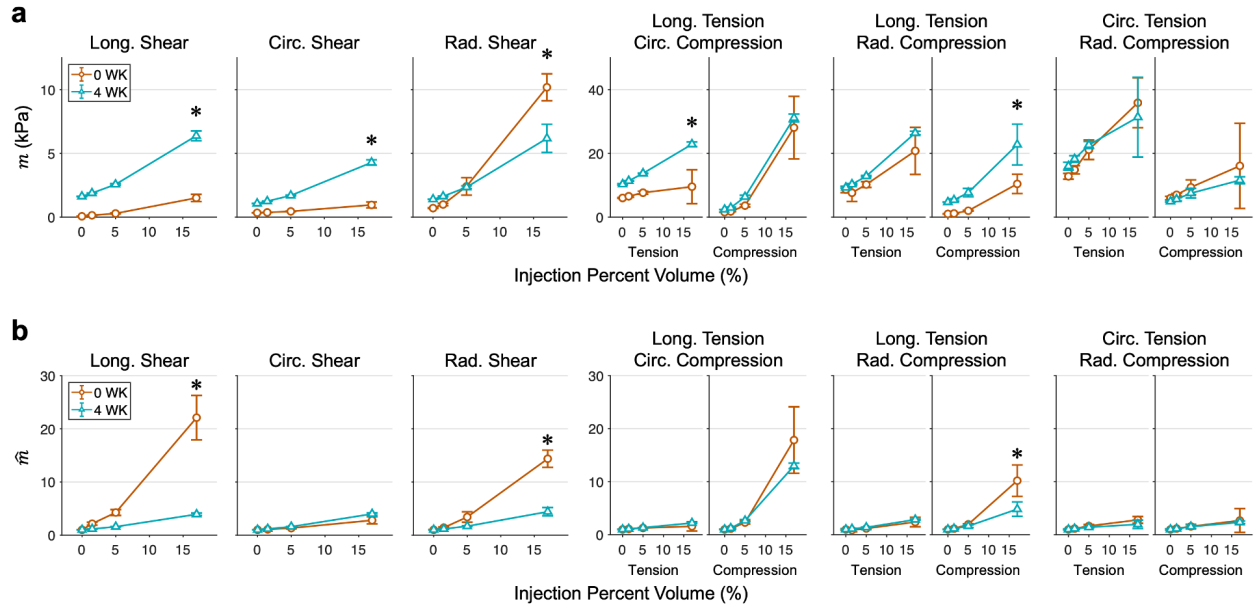

**Fig. A.2: Maximum tangent modulus as a function of injection volume.** (a) Absolute  $m$  and (b) normalized  $\hat{m}$  derived from finite element simulations of injected myocardium with hydrogels of increasing volume for the 0 WK (orange) and 4 WK (blue) post-MI time points. Quantities displayed as Mean  $\pm$  SEM. Significant differences between the 17% injection of the 0 WK and 4 WK time points indicated with  $*p \leq 0.05$ .

654 *Appendix A.3. Maximum principal strain vs. injection volume*

655 At maximum deformation, the Green-Lagrange strain tensor  $\mathbf{E}$  was calculated for all my-  
 656 ocardium elements within a spherical region of interest centered in the cube domain, ex-  
 657 cluding both distal myocardium elements and hydrogel elements. A volume-averaged strain  
 658 tensor  $\bar{\mathbf{E}}$  was obtained by averaging each corresponding component of  $\mathbf{E}$  across all elements  
 659 in the region of interest and used to determine the maximum principal strain for the my-  
 660 ocardium in each deformation mode. The maximum principal strain in each deformation  
 661 mode  $E_1$  was evaluated for all placement-volume combinations at both post-MI time points.

662 To assess maximum principal strain  $E_1$  as a function of injection volume, group averages  
 663 of all transmural placements (endo, mid, epi) were computed at each volume (0%, 1.5%, 5%,  
 664 and 17%),  $n = 3$  for each group. These computations were done separately for both post-MI  
 665 time points (0 WK and 4 WK). Group-averaged  $E_1$  was displayed as mean  $\pm$  standard error  
 666 of the mean (SEM).

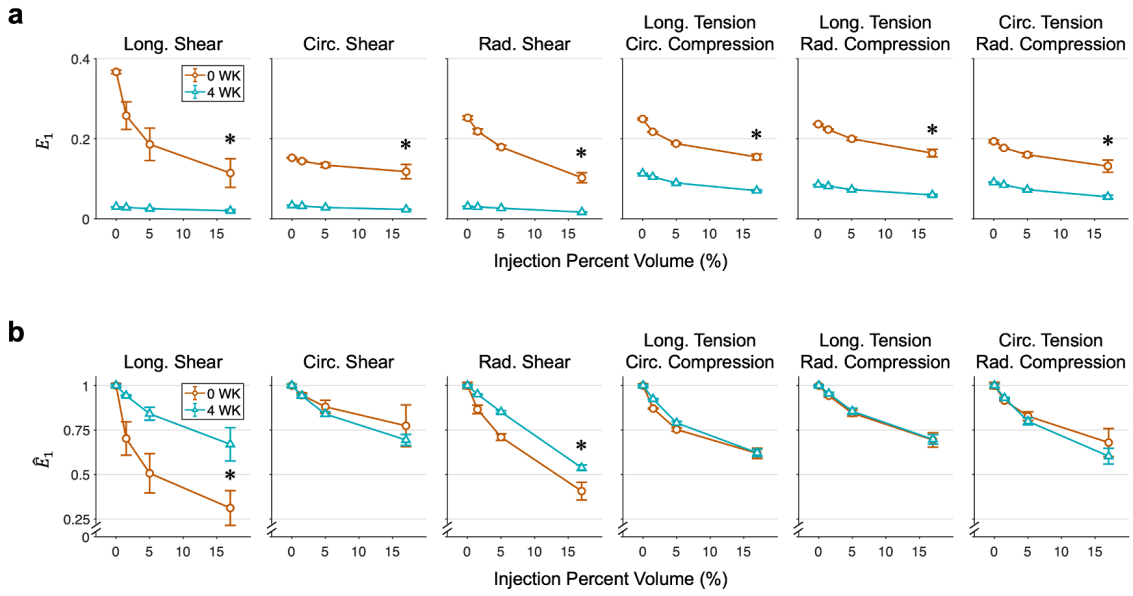

**Fig. A.3: Maximum principal strain as a function of injection volume.** (a) Absolute  $E_1$  and (b) normalized  $\hat{E}_1$  derived from finite element simulations of injected myocardium with hydrogels of varying placement and volume for the 0 WK (orange) and 4 WK (blue) post-MI time points. Quantities displayed as Mean  $\pm$  SEM. Significant differences between the 17% injection of the 0 WK and 4 WK time points indicated with  $*p \leq 0.05$ .

667 *Appendix A.4. Maximum principal strain vs. injection stiffness*

668 The maximum principal strain in each deformation mode  $E_1$  was evaluated as a function of  
 669 hydrogel modulus for the mid-placed inclusion of 17% cuboid volume. Evaluating changes  
 670 in maximum principal strain as a function of hydrogel stiffness was performed using only the  
 671 17% injection volume with a mid placement.

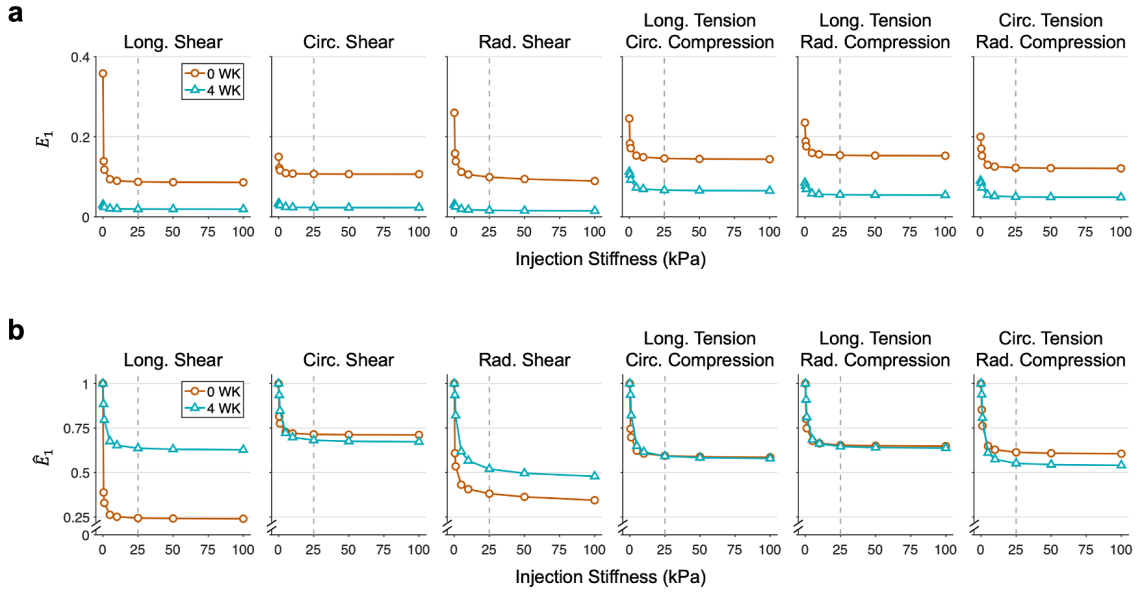

**Fig. A.4: Maximum principal strain as a function of injection stiffness.** (a) Absolute  $E_1$  and (b) normalized  $\hat{E}_1$  derived from finite element simulations of the 0 WK and 4 WK post-MI time points undergoing optimal deformations modes with increasing hydrogel modulus. The largest injection volume (17%) at mid placement is evaluated. Further increases in modulus have a minimal effect beyond stiffness values indicated by the dotted gray lines.
